1 Genetic variation for ontogenetic shifts in metabolism underlies physiological homeostasis in

2 *Drosophila*

3

4 Omera B. Matoo\*, Cole R. Julick, and Kristi L. Montooth

5 School of Biological Sciences, University of Nebraska-Lincoln, NE 68502

6

7 \* Corresponding author:

8 Omera B. Matoo

9 1104 T Street

10 Lincoln, NE 68588-0118

11 [omatoo2@unl.edu](mailto:omatoo2@unl.edu)

12 **Abstract**

13 Organismal physiology emerges from metabolic pathways and structures that can vary across  
14 development and among individuals. Here we tested whether genetic variation at one level of  
15 physiology can be buffered at higher levels during development by the inherent capacity for  
16 homeostasis in physiological systems. We found that the fundamental scaling relationship  
17 between mass and metabolic rate, as well as the oxidative capacity per mitochondria, differed  
18 significantly across development in the fruit fly *Drosophila*. However, mitochondrial respiration  
19 rate was maintained across development at similar levels. Furthermore, genotypes clustered into  
20 two types—those that switched to aerobic, mitochondrial ATP production before the second  
21 instar and those that relied on anaerobic production of ATP via glycolysis through the second  
22 instar. Despite genetic variation for the timing of this metabolic shift, second-instar metabolic  
23 rate was more robust to genetic variation than was the metabolic rate of other instars. We also  
24 found that a mitochondrial-nuclear genotype with disrupted mitochondrial function both  
25 increased aerobic capacity more through development and relied more heavily on anaerobic ATP  
26 production relative to wildtype genotypes. By taking advantage of both ways of making ATP,  
27 this genotype maintained mitochondrial respiratory capacity, but also generated more free  
28 radicals and had decreased mitochondrial membrane potential, potentially as a physiological-  
29 defense mechanism. Taken together, the data revealed that genetic defects in core physiology can  
30 be buffered at the organismal level via physiological compensation and that natural populations  
31 likely harbor genetic variation for distinct metabolic strategies in development that generate  
32 similar organismal outcomes.

33

34 **Keywords:** mtDNA, metabolism, oxidative phosphorylation, reactive oxygen species

35

## Introduction

36 Metabolism is the sum total of biochemical processes by which organisms use energy to  
37 sustain life and fuel reproduction, and an individual's metabolic rate is often interpreted as an  
38 integrated measure of its “pace of life”(Glazier, 2005, 2014, 2015). Early surveys of molecular  
39 variation revealed a surprising amount of genetic variation segregating in natural populations at  
40 the loci encoding these biochemical processes (Harris, 1966; Hubby and Lewontin, 1966;  
41 Lewontin and Hubby, 1966), a pattern that has been historically used to advocate both for the  
42 predominance of classical mutation, drift and purifying selection forces (Kimura 1983) and for  
43 the maintenance of variation through selection (Gillespie, 1999) (reviewed by Charlesworth and  
44 Charlesworth, 2016). Subsequent surveys revealed substantial quantitative genetic variation in  
45 metabolic enzyme activities within species, arising from both molecular variation at enzyme-  
46 encoding loci, as well as trans-acting and epistatic variation throughout the genome (Clark and  
47 Wang, 1997; Clark *et al.*, 1995a, 1995b; Laurie-Ahlberg *et al.*, 1980, 1982; Mitchell-Olds and  
48 Pedersen, 1998; Montooth *et al.*, 2003). In a few cases, this biochemical variation has been  
49 linked to variation at higher levels of physiological or organismal performance (Crawford and  
50 Oleksiak, 2007; Laurie-Ahlberg *et al.*, 1982; Montooth *et al.*, 2003; Watt *et al.*, 1983) and in  
51 some cases may be adaptive (Tishkoff *et al.*, 2001; Verrelli and Eanes, 2001; Watt, 1977; Watt *et*  
52 *al.*, 2003). However, we still lack a general mechanistic understanding of how genetic variation  
53 in the pathways of metabolism is transformed up the hierarchical levels of biological  
54 organization to result in variation for the organismal performance traits that determine fitness.  
55 This understanding is important for consideration of metabolism as an adaptive phenotype and  
56 for predicting how selection on metabolic performance will shape variation in genomes.

57 A challenge to connecting genetic variation in biochemical processes to metabolic  
58 performance, is that metabolism is an emergent property of interacting biochemical, structural,  
59 regulatory and physiological systems, often arranged in hierarchical functional modules  
60 (Barabási and Oltvai, 2004; Jeong *et al.*, 2000; Ravasz *et al.*, 2002; Strogatz, 2001). In addition,  
61 metabolic enzymes and metabolites have potential "moonlighting" functions in the signaling that  
62 underlies metabolic homeostasis (Marden, 2013; Boukouris *et al.*, 2016). The capacity for  
63 homeostasis in physiological systems, also suggests that genetic variation in biochemical  
64 processes at one level of the energetic hierarchy may not necessarily result in organismal fitness  
65 variation. In other words, the physiological regulatory processes that maintain energy  
66 homeostasis may provide stability in metabolic trajectories, in an analogous way to the canalized  
67 developmental trajectories envisioned by Waddington (Meiklejohn and Hartl, 2002;  
68 Waddington, 1942, 1957). Furthermore, a diversity of biochemical pathways may be available to  
69 achieve similar energetic outputs. Finally, the hierarchical biological processes that contribute to  
70 metabolism are influenced by both extrinsic (e.g., temperature, resource availability, habitat, and  
71 infection status) and intrinsic (e.g., genotype, life stage, sex, activity level, and reproductive  
72 status) factors [reviewed (Glazier, 2005)], such that genetic variation in biochemical processes  
73 may affect organismal performance and fitness in only a subset of conditions. Such conditionally  
74 neutral variation is expected to experience less effective selection, as it will be seen by selection  
75 in only a fraction of contexts (Van Dyken and Wade, 2010).

76 Development is a potentially important context for the expression of genetic variation in  
77 metabolism. During development, organisms partition energetic resources between the  
78 competing demands of growth, development, maintenance, and storage for future reproduction.  
79 Energy homeostasis during development is largely achieved by feedback controls where energy-

80 demand processes increase the concentration of ADP, which can then be fed as a substrate for  
81 energy-supply processes to generate ATP. As key metabolic organelles, the mitochondria play a  
82 central role in the energy supply-demand balance. Not only the abundance and activity of  
83 mitochondria, but also the surface area, membrane composition, and cellular network structure  
84 of mitochondria have been reported to affect metabolism (Miettinen and Björklund, 2017; Porter  
85 and Brand, 1993; Porter *et al.*, 1996). In addition, both mitochondrial and nuclear genomes  
86 interact closely to form the protein complexes of oxidative phosphorylation (OXPHOS) that  
87 drive aerobic ATP production, creating the potential for inter-genomic epistasis to underlie  
88 variation in metabolic phenotypes. At present, our understanding of how the underlying  
89 genetic architecture and its variation affects metabolism is incomplete; but studies indicate that  
90 both nuclear DNA (nDNA) (Montooth *et al.*, 2003; Nespolo *et al.*, 2007; Tieleman *et al.*, 2009),  
91 mitochondrial DNA (mtDNA) (Arnqvist *et al.*, 2010; Ballard and Rand, 2005; Kurbalija *et al.*,  
92 2014; Martin, 1995), and interactions between genomes and environment are involved in  
93 determining metabolism (Hoekstra *et al.*, 2013; Hoekstra *et al.*, 2018).

94 Energy balance is particularly keen in holometabolous species where larval development and  
95 growth tends to be rapid and massive, requiring simultaneous accumulation of the resources  
96 needed to fuel metamorphosis and emergence as a reproductive adult. *Drosophila melanogaster*  
97 is an especially powerful system to study developmental metabolism, given the genetic resources  
98 and an approximately 200-fold increase in body mass across three larval instars (Church and  
99 Robertson, 1966). There is evidence of significant genetic variation for metabolic rate within  
100 *Drosophila* species (Montooth *et al.*, 2003; Hoekstra *et al.*, 2013), and mitochondrial–nuclear  
101 genotypes that disrupt mitochondrial function also adversely affect larval metabolic and  
102 development rates (Meiklejohn *et al.*, 2013; Hoekstra *et al.*, 2013). Transcriptomic and metabolic

103 profiling in *D. melanogaster* indicate the dynamic nature of energy homeostasis that draws on  
104 both aerobic and anaerobic energy production, as well as the presence of proliferative metabolic  
105 programs during larval development (Graveley *et al.*, 2011; Tennessen *et al.*, 2011). Despite this  
106 wealth of data, at present, we lack a detailed understanding of the links between genome  
107 variation, mitochondrial function and organismal metabolic rate during development in  
108 *Drosophila*.

109 In the present study, we tested whether metabolic strategies in *D. melanogaster* varied among  
110 genotypes and across larval instars for both wildtype and mitochondrial-nuclear genotypes that  
111 generate energetic inefficiencies. We found that there is significant variation for the ontogeny of  
112 metabolism at the level of mitochondrial aerobic capacity, but that this variation can be buffered  
113 at higher levels of metabolic performance via physiological homeostasis. In this way, we show  
114 that there may be multiple genotypic and physiological paths to equivalent organismal outcomes  
115 within populations.

116

## 117 **Methods**

### 118 *Drosophila* stocks and maintenance

119 We used four *Drosophila* mitochondrial-nuclear genotypes generated by Montooth *et al.*, 2010.  
120 The (*mtDNA*);*nuclear* genotype (*simw*<sup>501</sup>);*OreR* has a genetic incompatibility that decreases  
121 oxidative phosphorylation (OXPHOS) activity putatively via compromised mitochondrial protein  
122 translation, and disrupts larval metabolic rate, resulting in delayed development, decreased  
123 immune function, and reduced female fecundity (Meiklejohn *et al.*, 2013; Hoekstra *et al.*, 2013;  
124 Holmbeck *et al.*, 2015; Zhang *et al.*, 2017; Hoekstra *et al.*, 2018; Buchanan *et al.*, 2018). This  
125 mitochondrial-nuclear (hereafter referred to as mito-nuclear) incompatibility arises from an

126 epistatic interaction between naturally-occurring single nucleotide polymorphisms (SNPs) in the  
127 mt-tRNA<sup>Tyr</sup> gene and the nuclear-encoded mt-tyrosyl-tRNA synthetase gene *Aatm* that  
128 aminoacylates this mitochondrial tRNA (Meiklejohn *et al.*, 2013). The other three genotypes –  
129 *(ore);OreR*, *(simw<sup>501</sup>);Aut*, and *(ore);Aut* – serve as wildtype genetic controls that enabled us to  
130 test for the effects of mitochondrial and nuclear genotypes, separately and interactively, on  
131 developmental physiology. Additionally, we measured traits in two inbred genotypes sampled in  
132 Vermont (*VT4* and *VT10*) as representatives of natural populations that were not manipulated to  
133 generate specific mito-nuclear genotypes.

134 All genotypes were raised on standard cornmeal-molasses-yeast *Drosophila* media and  
135 acclimated to 25°C with a 12 h:12 h dark:light cycle for at least three generations prior to all  
136 experiments. To collect first-, second- and third-instar larvae, adults were allowed to lay eggs for  
137 3-4 hours on standard media, and larvae from these cohorts were staged based on developmental  
138 time and distinguishing morphological features.

139

#### 140 *Larval metabolic rate*

141 Routine metabolic rate was measured as the rate of CO<sub>2</sub> produced by groups of twenty larvae of  
142 the same instar and genotype using a flow-through respirometry system (Sable Systems  
143 International, Henderson, NV) with established protocols (Hoekstra *et al.*, 2013). Groups of  
144 larvae were collected onto the cap of 1.7 mL tube containing 0.5 mL of fly media and placed  
145 inside one of four respirometry chambers that were housed in a temperature-controlled cabinet  
146 (Tritech™ Research, Los Angeles, CA) maintained at 25°C. Between 8 and 13 biological  
147 replicates for each genotype and instar were randomized across chambers and respirometry runs,  
148 during which each group of larvae was sampled for CO<sub>2</sub> production for two, ten-minute periods.

149 CO<sub>2</sub> that accumulated in the chambers as a result of larval metabolism was detected using an  
150 infrared CO<sub>2</sub> analyzer (Li-Cor 7000 CO<sub>2</sub>/H<sub>2</sub>O Analyzer; LI-COR, Lincoln, NE).  $\dot{V}CO_2$  was  
151 calculated from the mean fractional increase in CO<sub>2</sub> at a constant air-flow rate of 100 ml/min  
152 over a 10 min time interval for each replicate after baseline drift correction. The wet weight of  
153 the group of larvae was recorded using a Cubis® microbalance (Sartorius AG, Göttingen,  
154 Germany) at the beginning of each respirometry run.

155

### 156 *Isolation of Mitochondria*

157 Mitochondria were isolated from larvae following a protocol modified from Aw *et al.*, 2016.  
158 100-200 larvae were collected and rinsed with larval wash buffer (0.7% NaCl and 0.1% Triton  
159 X-100). Larvae were very gently homogenized in 300-500  $\mu$ L of chilled isolation buffer (154  
160 mM KCl, 1 mM EDTA, pH 7.4) in a glass-teflon Thomas® homogenizer on ice. The  
161 homogenate was filtered through a nylon cloth into a clean chilled microcentrifuge tube. The  
162 homogenate was then centrifuged at 1500g for 8 min at 4°C (Eppendorf Centrifuge 5810R). The  
163 resulting mitochondrial pellet was suspended in 40-50  $\mu$ L of ice-cold mitochondrial assay  
164 solution (MAS: 15 mM KCl, 10 mM KH<sub>2</sub>PO<sub>4</sub>, 2 mM MgCl<sub>2</sub>, 3 mM HEPES, 1 mM EGTA, FA-  
165 free BSA 0.2%, pH 7.2). Unless otherwise stated, all chemicals were purchased from Sigma  
166 Aldrich (St Louis, MO) or Fisher Scientific (Pittsburgh, PA) and were of reagent grade or higher.  
167

### 168 *Mitochondrial Respiration*

169 Oxygen consumption of freshly isolated mitochondria was measured using the Oxygraph Plus  
170 System (Hansatech Instruments, Norfolk, UK) in 3 mL water-jacketed glass chambers equipped  
171 with a magnetic stirrer and Clark-type oxygen electrodes. Temperature of the respiration



172 chambers was kept constant at 25°C using a Fisher Isotemp® 4100 R20 refrigerated water  
173 circulator (Fisher Scientific, Hampton, NH). A two-point calibration of electrodes using air-  
174 saturated distilled water and sodium sulfite was done for establishing 100% and zero oxygen  
175 levels in the chamber, respectively. The assay was completed within 2 hours of mitochondrial  
176 isolation, and six or seven biological replicates were measured for each larval stage of each  
177 genotype. 50 µL (~1.5 mg protein) of mitochondrial suspension was added to 950 µL of MAS in  
178 the respiration chamber. Pyruvate (5mM) and malate (2.5mM) were used as respiratory  
179 substrates at saturating amounts. Maximum respiration (State 3) was achieved by adding 400 µM  
180 of ADP, and State 4<sup>+</sup> respiration was calculated as described by Chance and Williams 1955 by  
181 adding 2.5 µg ml<sup>-1</sup> oligomycin. Oligomycin is an ATPase inhibitor and State 4<sup>+</sup> gives an estimate  
182 of oxygen consumption linked to mitochondrial proton leak, rather than to ATP production, at  
183 high membrane potential (Brand *et al.*, 1994). Uncoupled respiration (State 3u), indicative of  
184 maximum respiration or electron transport system (ETS) capacity, is achieved by adding 0.5 µM  
185 of carbonyl cyanide m-chlorophenyl hydrazone (CCCP). CCCP is a protonophore that increases  
186 proton permeability in mitochondria and effectively disconnects ETS from ATPase. Data were  
187 acquired and respiration rates were corrected for electrode drift using the OxyTrace<sup>+</sup> software.  
188 The respiratory control ratio (RCR) was calculated as the ratio of State 3 over State 4<sup>+</sup>  
189 (Estabrook 1967). Respiration rates were normalized by unit mitochondrial protein added.  
190 Protein concentrations were determined using Bio-Rad Protein Assay Dye Reagent Concentrate  
191 (Bio-Rad, 5000006) and bovine serum albumin (BSA) as a standard.

192

193 *Mitochondrial membrane potential ( $\Delta\Psi_m$ )*

194 Mitochondrial membrane potential was measured using the JC-1 indicator dye (Fisher Scientific,  
195 Hampton, NH) following a protocol modified from Villa-Cuesta *et al.*, 2014. 100 mg of larvae  
196 were weighed and used to isolate mitochondria as described above. Approximately 1.4 mg of  
197 mitochondrial protein was added and the final volume was increased to 300  $\mu$ L using MAS. 3  $\mu$ L  
198 of a 1  $\mu$ g/ $\mu$ L solution of JC-1 dissolved in dimethyl sulfoxide (DMSO) was added to the  
199 suspension. Mitochondrial samples were incubated for 30 min at 37°C protected from light. At  
200 the end of incubation, samples were centrifuged for 3 min at 6000g and suspended in 600  $\mu$ L of  
201 fresh MAS. Mitochondrial membrane potential was expressed as the ratio of fluorescence for  
202 aggregate:monomeric forms of JC-1 at red (excitation 485 nm, emission 600 nm) and green  
203 (excitation 485 nm, emission 530 nm) wavelengths respectively. 50  $\mu$ M of CCCP was added to  
204 collapse membrane potential as a negative control.

205

#### 206 *Citrate synthase activity*

207 Citrate synthase activity was measured following the protocol from Meiklejohn *et al.*, 2013. 100-  
208 200 larvae were homogenized in 1 mL chilled isolation buffer (225 mM mannitol, 75 mM  
209 sucrose, 10 mM MOPS, 1 mM EGTA, 0.5% fatty acid-free BSA, pH 7.2) using a glass-teflon  
210 Thomas® homogenizer. The homogenate was centrifuged at 300g for 5 min at 4°C (Eppendorf  
211 Centrifuge 5810R). The supernatant was transferred into a clean tube and centrifuged again at  
212 6000g for 10 min at 4°C. The resulting mitochondrial pellet was resuspended in 50  $\mu$ L of  
213 respiration buffer (225 mM mannitol, 75 mM sucrose, 10 mM KCl, 10 mM Tris-HCl, and 5 mM  
214  $\text{KH}_2\text{PO}_4$ , pH 7.2). All samples were stored at -80°C till further analysis.

215 Maximum citrate synthase activity ( $V_{\text{max}}$ ) of the mitochondrial extracts was measured  
216 spectrophotometrically at 30°C using a Synergy 2 plate reader (BioTek, VT, USA). 6  $\mu$ g of

217 mitochondrial protein was added to the assay mixture containing 100mM Tris-HCl (pH 8.0), 2.5  
218 mM EDTA, 100  $\mu$ M Acetyl Co-A and 100  $\mu$ M of DTNB [5,5'-dithiobis (2-nitrobenzoic acid)].  
219 The reaction was monitored for 2 min as a background reading. The reaction was then started by  
220 adding 500  $\mu$ M oxaloacetate to the assay to generate CoA-SH. CoA-SH is then detected by its  
221 reaction with DTNB to form a yellow product (mercaptide ion) that was measured using  
222 absorbance at 412 nm. Enzyme activity was normalized by protein concentration of the sample  
223 added. Six biological samples per genotype and instar were measured, each with two technical  
224 replicates.

225

#### 226 *Lactate quantification*

227 Whole-body lactate concentrations were measured by an NAD<sup>+</sup>/NADH-linked fluorescent assay  
228 following the protocol of Callier *et al.*, 2015. 100-200 larvae were homogenized in 100-500  $\mu$ L  
229 of 17.5% perchloric acid and centrifuged at 14,000g for 2 min at 4°C (Eppendorf Centrifuge  
230 5810R). Following precipitation of proteins, the clear supernatant was transferred into a clean  
231 tube and neutralized with a buffer containing 2 M of KOH and 0.3 M of MOPS, and again  
232 centrifuged at 14,000g for 2 min at 4°C. 20-50  $\mu$ L of neutralized sample was added to the assay  
233 buffer (pH 9.5) containing a final concentration of 1000 mM hydrazine, 100 mM Tris-base, 1.4  
234 mM EDTA and 2.5 mM NAD<sup>+</sup> in a 96-well plate (Micro Flour® 1). The assay was performed in  
235 fluorescence mode (Ex/Em = 360/460 nm) using a Synergy H1 Hybrid Reader (BioTek, VT,  
236 USA). After incubating the plate at 5 min at room temperature, a background reading was taken.  
237 17.5 U/well lactate dehydrogenase (Sigma L3916) diluted with Tris buffer was then added to  
238 each sample and the reaction mixture was allowed to incubate at 37°C for 30 min protected from  
239 light. A second reading was then taken to measure NADH levels, after correcting for background

240 fluorescence. Six biological samples per genotype and instar were measured, each with two  
241 technical replicates. Sodium lactate was used as a standard for the assay. Lactate concentrations  
242 in the samples were normalized by wet weight of the larvae.

243

#### 244 *Hydrogen peroxide (H<sub>2</sub>O<sub>2</sub>) quantification*

245 100-200 larvae were weighed, rinsed with larval wash buffer (0.7% NaCl and 0.1% Triton X-  
246 100) and homogenized in 500  $\mu$ L of pre-chilled assay buffer (pH 7.5) containing 20 mM HEPES,  
247 100 mM KCl, 5% glycerol, 10 mM EDTA, 0.1% Triton X-100, 1 mM PMSF (Sigma P7626) and  
248 1:10 (v/v) protease inhibitor cocktail (Sigma P2714) using a glass-teflon Thomas® homogenizer.  
249 The homogenate was centrifuged at 200g for 5 min at 4°C, and the supernatant was stored at -  
250 80°C. H<sub>2</sub>O<sub>2</sub> concentration was determined with a fluorometric Hydrogen Peroxide (H<sub>2</sub>O<sub>2</sub>) Assay  
251 Kit (Sigma MAK 165) following the manufacturer's protocol in a 96-well plate (Micro Flour®  
252 1) using the Synergy H1 Hybrid Reader (BioTek, VT, USA). Six biological samples per genotype  
253 and instar were measured, each with two technical replicates. H<sub>2</sub>O<sub>2</sub> concentrations in the samples  
254 were expressed as nM/ $\mu$ g of protein.

255

#### 256 *Statistical analyses*

257 All statistical analyses used the statistical package R version 2.15.1 (R Development Core Team  
258 2011). We implemented standard major-axis regression in the R-package SMATR (Warton *et*  
259 *al.*, 2006; Hoekstra *et al.*, 2013) to estimate the relationship between log-transformed mass and  
260  $\dot{V}\text{CO}_2$ , and to test for larval-instar and genetic effects on the slope of this relationship. When there  
261 was statistical evidence for a common slope among genotypes, we fit the common slope to test  
262 for effects of genotype on the y-intercept (i.e., genetic effects on the mass-specific metabolic

263 rate). We removed a single observation where a first-instar replicate had a  $\dot{V}\text{CO}_2$  value less than  
264 zero. Analysis of variance (ANOVA) was used to test for the fixed effects of mtDNA, nuclear  
265 genome, larval instar, and all interactions on lactate accumulation,  $\text{H}_2\text{O}_2$  concentration,  
266 mitochondrial physiology (State3, State4, uncoupled respiration,  $\text{RCR}^+$ , and  $\Delta\Psi_m$ ) and citrate  
267 synthase activity in an ANOVA design. Post-hoc comparisons among instars within genotypes  
268 and among genotypes within instar were evaluated using Tukey HSD tests.

#### 269 *Data Availability*

270 Stocks and strains are available upon request. Supplemental files are available at FigShare.

271 Phenotypic data will be deposited in the Dryad Digital Repository upon publication.

272

273

## Results

### 274 *Metabolic rate scaling with mass varies across larval instars and genotypes*

275 Metabolic rate scales with mass according to the power function  $R = aM^b$ , where  $a$  is the constant  
276 scaling coefficient,  $M$  is mass, and  $b$  is the scaling exponent. The scaling exponent  $b$ , estimated  
277 by the slope of the relationship between log-transformed metabolic rate and mass, differed  
278 significantly across larval instars (Fig. 1A) ( $LR = 18.1$ ,  $df = 2$ ,  $P = 0.0001$ ). Metabolic scaling  
279 with body mass was hypermetric in first-instar larvae ( $b$  (CI) = 1.42 (1.21, 1.67)), isometric in  
280 second-instar larvae ( $b = 1.04$  (0.95, 1.15)), and hypometric in third-instar larvae ( $b = 0.85$  (0.71,  
281 1.01)). Within first- and second-instar larvae, there was no evidence that metabolic scaling with  
282 mass differed significantly among genotypes, nor were there significant effects of genotype on  
283 the elevation of the fitted relationship (i.e., on the mass-specific metabolic rate) (Fig. 1B, 1C and  
284 Table 1). However, there was more variance among genotypes in mass-specific metabolic rate in  
285 first-instar larvae relative to second-instar larvae (Fig. 1B, 1C and Table 1). Metabolic scaling

286 with mass in third-instar larvae differed significantly among genotypes, as evidenced by  
287 significantly different slopes (Fig. 1D and Table 1). The variation in metabolic scaling with mass  
288 did not result from natural lines differing from mito-nuclear genotypes, but rather from variation  
289 in the scaling exponent within both sets of genotypes. The pattern was significant regardless of  
290 the inclusion of several data points that, while not statistical outliers, did appear as outliers in the  
291 relationship between metabolic rate and mass (Fig. 1D and Supplemental Table 1).

292

### 293 *Mitochondrial respiration is similar across larval instars and genotypes*

294 Despite these ontogenetic and genetic differences in the scaling of organismal metabolic rate  
295 with mass, second- and third-instar larvae had similar rates of mitochondrial oxygen  
296 consumption linked to ATP production (i.e., State 3 respiration) per unit of mitochondrial protein  
297 in both mito-nuclear genotypes (*instar*,  $P = 0.13$ ) and natural genotypes (*instar*,  $P = 0.12$ ) (Fig.  
298 2) (Supplemental Table 2). State 3 respiration from first-instar larvae mitochondrial preparations  
299 were either below our detection limits or of low-quality, even when including similar amounts of  
300 larval mass in the preparation. This indicates that there is likely an increase in mitochondrial  
301 quantity or functional capacity between the first- and second-larval instars. Furthermore, State 3  
302 respiration did not differ significantly among mito-nuclear or natural genotypes, nor were there  
303 any significant interactions between instar and genetic factors (Supplemental Table 2).

304 Maximum respiratory capacity of mitochondria (or CCCP- induced uncoupled respiration) was  
305 also maintained across instars in all mito-nuclear genotypes (*instar*,  $P = 0.18$ ) (Supplemental Fig.  
306 1A and Supplemental Table 2). However, the natural genotype *VT10* had a significantly elevated  
307 maximal respiratory capacity in the second instar that resulted in a significant instar-by-genotype  
308 interaction ( $P = 0.001$ ) (Supplemental Fig. 1A and Supplemental Table 2).

309 Healthy mitochondria have high rates of oxygen consumption and ATP production when  
310 ADP is abundant (i.e., State 3 respiration), but low rates of oxygen consumption in the absence  
311 of ATP synthesis (i.e., State 4<sup>+</sup> respiration). The ratio of these two measures is called the  
312 respiratory control ratio (RCR<sup>+</sup>). While the RCR<sup>+</sup> was generally maintained at a ratio of 2-3  
313 across genotypes and instars, two genotypes, (*ore*);*OreR* and *VT10*, had elevated RCR in third-  
314 instar larvae that contributed to a significant instar-by-genotype interaction in both mito-nuclear  
315 (instar x nuclear,  $P = 0.004$ ) and natural genotypes (instar x genotype,  $P = 0.0001$ )  
316 (Supplemental Fig. 1B and Supplemental Table 2). This was due to decreased State 4<sup>+</sup> respiration  
317 in second-instar mitochondria from these genotypes (Supplemental Fig. 1C and Supplemental  
318 Table 2).

319

#### 320 *Certain genotypes use anaerobic ATP production further into development*

321 We measured the activity of citrate synthase, a nuclear-encoded enzyme located in the  
322 mitochondrial matrix. As the first step in the Tricarboxylic Acid (TCA) cycle, the activity of this  
323 enzyme is often used as an indicator of cellular oxidative capacity. Citrate synthase activity per  
324 unit of mitochondrial protein increased across development in all genotypes (Fig. 3) (mito-  
325 nuclear genotypes: instar,  $P < 0.0001$ ; natural genotypes: instar,  $P < 0.0001$ ). There were also  
326 genotype-specific effects on citrate synthase activity. The energetically compromised  
327 (*simw*<sup>501</sup>);*OreR* genotype had elevated citrate synthase activity relative to other genotypes across  
328 all three instars (Fig. 3), resulting in significant epistatic mito-nuclear variance for this measure  
329 of oxidative capacity (mito x nuclear,  $P = 0.022$ ) (Supplemental Table 3). Genotype-by-instar  
330 interactions significantly affected citrate synthase activity in the natural genotypes (instar x  
331 genotype,  $P = 0.010$ ). Genotypes could be categorized as those for which citrate synthase reaches

332 is maximal level by the second instar (e.g., *VT10* and *(ore);Aut*) and those for which second-  
333 instar mitochondria have citrate synthase activity levels intermediate to first- and third-instar  
334 mitochondria (e.g., *VT4* and *(ore);OreR*) (Fig. 3).

335 In addition to aerobic, oxidative ATP production, *D. melanogaster* larvae use anaerobic,  
336 glycolytic ATP production that results in the production of lactate. There was significant genetic  
337 variation in the extent to which larvae accumulated lactate during development. Second-instar  
338 larvae of some genotypes significantly accumulated lactate, while others genotypes did not  
339 accumulate any lactate across development (Fig. 4A). This pattern was observed in both the  
340 mito-nuclear genotypes (instar x mtDNA x nuclear,  $P = 0.033$ ) as well as in the natural  
341 genotypes (instar x genotype,  $P = 0.009$ ). The energetically compromised (*simw<sup>501</sup>*);*OreR*  
342 genotype accumulated the highest amounts of lactate in the second instar, relative to other  
343 genotypes, resulting in a strong mito-nuclear interaction (Fig. 4B and Supplemental Table 4).  
344 However, the natural genotype *VT4* also accumulated high levels of lactate in second-instar  
345 larvae (Fig. 4A). Furthermore, genotypes that had intermediate levels of citrate synthase activity  
346 during the second instar (e.g., *VT4* and *(ore);OreR*) also tended to have increased lactate  
347 accumulation during the second instar.

348  
349 *The mito-nuclear incompatible genotype accumulates more ROS and has lower mitochondrial*  
350 *membrane potential*

351 All genotypes had significantly increased levels of H<sub>2</sub>O<sub>2</sub> by the third instar, relative to earlier  
352 instars ( $P < 0.0001$ ) (Fig. 5A and Supplemental Table 5). However, the energetically-  
353 compromised (*simw<sup>501</sup>*);*OreR* genotype had significantly elevated levels of H<sub>2</sub>O<sub>2</sub> in the second  
354 instar, both relative to other genotypes and to first- and third-instars of the same genotype. This



355 resulted in a significant effect of the instar x mtDNA x nuclear interaction on levels of H<sub>2</sub>O<sub>2</sub> ( $P <$   
356 0.0001) (Fig. 5B and Supplemental Table 5).

357 Because mitochondrial membrane potential ( $\Delta\Psi_m$ ) provides the driving force that is utilized  
358 by ATP synthase (complex V of OXPHOS) to make ATP and is used as an indicator of  
359 mitochondrial viability and cellular health, we tested whether this was disrupted in  
360 (*simw*<sup>501</sup>);*OreR*. All genotypes, except (*simw*<sup>501</sup>);*OreR*, maintained high levels of mitochondrial  
361 membrane potential in second- and third-instar larvae (Fig. 6A and Supplemental Table 6). The  
362 energetically-compromised (*simw*<sup>501</sup>);*OreR* genotype had significantly lower mitochondrial  
363 membrane potential relative to other genotypes in both second- and third-instar larvae. The effect  
364 of the mito-nuclear interaction on this marker of mitochondrial and cellular health was  
365 particularly pronounced in the second instar (instar x mtDNA x nuclear  $P < 0.0001$ ) (Fig. 6B and  
366 Supplemental Table 6).

367 In summary, the maintenance of mitochondrial respiration in the energetically compromised  
368 (*simw*<sup>501</sup>);*OreR* genotype across second and third instars was coincident with significant  
369 increases in oxidative capacity of mitochondria, increased lactate and ROS production during the  
370 second instar, and decreased mitochondrial membrane potential.

371

372

## Discussion

373 *Ontogenetic shifts in the relationship between metabolic rate and mass*

374 Metabolic rates scale allometrically with mass, but the parameters that define this  
375 relationship vary among taxa, genotypes, life stages and environments (Glazier, 2005; Greenlee  
376 *et al.*, 2014). We found that the relationship between mass and metabolic rate differed  
377 significantly among larval instars of *D. melanogaster*. Metabolic scaling in developing animals

378 has been described as an “impasse of principles,” wherein the basic tenant of metabolic  
379 allometry—that the physiological principles of organisms are relatively conserved—is at odds  
380 with the basic tenant of development—that the physiological state of organisms is dynamic  
381 across ontogeny (Burggren, 2005). Insect development involves complex changes in cellular  
382 energy demand and body composition that likely affect how metabolic rate scales with mass.  
383 Thus, models and principles of interspecific allometric scaling may not be applicable to  
384 ontogenetic scaling.

385 We observed a shift from hypermetric scaling in first-instar larvae ( $b > 1$ ), to isometric  
386 allometry in second-instar larvae ( $b = 1$ ), followed by hypometric allometry in third-instar larvae  
387 ( $b < 1$ ). The shift in metabolic scaling towards lower mass-specific metabolic rates in larger  
388 instars, was in spite of our observation that larger instars had seemingly greater capacity for  
389 oxygen-dependent ATP production, as indicated by increased levels of citrate synthase activity  
390 per unit of mitochondria. Nevertheless, mitochondrial oxygen consumption linked to ATP  
391 production was maintained at similar levels across second- and third-instar larvae. These patterns  
392 suggest that although there may be increased oxidative capacity of mitochondria as development  
393 progresses, mitochondrial respiration and organismal respiration are not simple reflections of  
394 oxidative capacity, but rather are emergent properties of organellar, cellular and organismal  
395 processes.

396 The ontogenetic change in metabolic scaling that we observed may reflect a change in energy  
397 demand across development as larval growth transitions from cell proliferation to cell growth.  
398 Hypermetric metabolic scaling exponents ( $b > 1$ ), where metabolic rates of larger individuals are  
399 greater per unit mass, could result from the increased energetic costs associated with the rapid  
400 cell proliferation and increase in cell number early in *Drosophila* development (O’Farrell, 2004;

401 Vollmer *et al.*, 2017). Later in development, larval accumulation of mass occurs primarily via  
402 increases in cell volume (O'Farrell, 2004), reducing the surface area to volume ratio of cells and  
403 potentially limiting metabolism. These observations support studies, collectively grouped under  
404 Resource Demand (RD) models, that suggest that metabolic scaling is driven by an intrinsic  
405 metabolic demand from the cellular level to tissue growth potential (VonBertalanffy and  
406 Pirozynski, 1953; Shin and Yasuo, 1984, 1993; Ricklefs, 2003; Glazier, 2005). In this way, an  
407 organism's metabolic rate (and by extension metabolic scaling) across development is a  
408 reflection of the potential of tissues for proliferation and growth (Ricklefs, 2003). Our  
409 observations also contribute to a small, but growing number of insect studies that support a  
410 conceptual framework for patterns of intraspecific ontogenetic scaling where completion of  
411 growth in holometabolous insects is correlated with decreased mass-specific metabolic rates  
412 (Glazier, 2005). In both the tobacco hornworm *Manduca sexta*, and the silkworm *Bombyx mori*,  
413 metabolic scaling exponents also decrease across ontogeny (Blossman-Myer and Burggren,  
414 2010; Callier and Nijhout, 2011, 2012; Sears *et al.*, 2012).

415 Metabolic scaling with mass may also be influenced by the biochemical composition of the  
416 body. System Composition (SC) models hypothesize that ontogenetic changes in metabolic  
417 scaling reflect shifts in body composition and the relative proportions of metabolically active  
418 versus inert or "sluggish" tissues (Glazier, 2005; Isler and VanSchaik, 2006; Greenlee *et al.*,  
419 2014). Tissue lipid composition and lipid storage change across development in *Drosophila*, with  
420 a net increase of metabolically-inert storage lipids like triacylglycerides across development  
421 (Carvalho *et al.*, 2012). The increased contribution of less metabolically active tissue to the body  
422 could also contribute to the observed developmental shift from hypermetric to hypometric  
423 metabolic scaling. In *Manduca*, the contribution of metabolically active gut tissue to the body

424 decreases across development, which may contribute to an increasingly hypometric metabolic  
425 scaling with mass across development (Callier and Nijhout, 2012).

426 Genetic variation in body composition across development could also underlie the significant  
427 genetic variation in metabolic scaling that we observed in third-instar larvae. If genotypes differ  
428 in the degree to which they accumulate mass in the third instar via different types of energy  
429 storage, this could generate genetic variation for how metabolic rate scales with mass. Midway  
430 through the third instar, *D. melanogaster* membrane-lipid accumulation is paused, while levels of  
431 storage lipids like triacylglycerides increase (Carvalho *et al.*, 2012). This suggests a transition in  
432 the third instar from metabolism supporting membrane synthesis and cell proliferation to  
433 metabolism supporting mass accumulation via lipid storage. If genotypes vary in the timing or  
434 extent of this switch, as we have seen for mitochondrial metabolism (described below), this  
435 could contribute to the greater genetic variation for metabolic rate and scaling that we observed  
436 in this developmental stage.

437

438 *Genetic variation in cellular metabolism may support similar organismal outcomes*

439 Aerobic organisms can generate ATP via mitochondrial OXPHOS, but also anaerobically  
440 via glycolytic pathways that are supported by fermentation-generated NAD<sup>+</sup> (e.g., by lactate  
441 production). We observed a consistent pattern across genotypes of increased oxidative capacity  
442 to aerobically produce ATP across development, consistent with a metabolic switch from  
443 glycolytic to mitochondrial production of ATP regulated by the *Drosophila* estrogen-related  
444 receptor *dERR* (Tennessen *et al.*, 2011; Tennessen and Thummel, 2011). However, genotypes  
445 differentiated into two categories of metabolic phenotypes—those that appeared to switch to  
446 mitochondrial ATP production before the second instar and accumulated very little lactate, and

447 those that appeared to rely on glycolytic ATP production with significant lactate accumulation  
448 during the second instar. Yet, despite this genetic variation in how second-instar larvae were  
449 generating ATP, the organismal metabolic rate of second-instar larvae was more robust to  
450 genetic variation than were the metabolic rates of other instars. We also observed that despite  
451 this developmental switch from glycolytic to mitochondrial ATP production, *in vitro*  
452 mitochondrial respiration rates per unit mitochondrial protein remained constant across second-  
453 and third-instar larvae. Again, this highlights that organellar and organismal metabolic rates  
454 emerge from cellular, tissue and organismal-level processes, and are not simple reflections of the  
455 underlying metabolic pathways being used. In this way, higher levels of biological organization  
456 may buffer and potentially shelter genetic variation in metabolism from selection.

457 Using glycolytic ATP production may seem counterintuitive and less efficient than oxidative  
458 ATP production. However, glycolytic ATP production may provide several developmental  
459 advantages. First, it meets the bioenergetic needs of growth by providing abundant ATP. Despite  
460 the low yield of ATP per glucose consumed, the percentage of total cellular ATP produced from  
461 glycolysis can exceed that produced by OXPHOS (Lunt and Vander-Heiden, 2011). Second,  
462 there are reports of moonlighting functions of glycolytic enzymes translocating to the nucleus  
463 where they act as transcription factors to promote proliferation (Marden, 2013; Lincet and Icard,  
464 2014; Boukouris *et al.*, 2016). Third, glycolytic ATP production enables flux through the pentose  
465 phosphate and TCA pathways to provide carbon-backbone intermediates for building  
466 macromolecules such as ribose sugars for DNA, amino acids for proteins, glycerol and citrate for  
467 lipids, as well as reducing power to support cell proliferation and growth during development  
468 (Tennessen *et al.*, 2011, 2014; Tennessen and Thummel, 2011; Lunt and Vander-Heiden, 2011).

469 *dERR* is responsible for a vital transcriptional switch of carbohydrate metabolism in second-  
470 instar larvae (Tennessen *et al.*, 2011) that coincides with increases in lactate dehydrogenase  
471 (*dLDH*) and lactate accumulation (Li *et al.*, 2017). *dLDH* activity recycles  $\text{NAD}^+$  which allows  
472 for continued glycolytic ATP production and supports the TCA cycle in generating cellular  
473 building blocks. Furthermore, *dLDH* expression and lactate production results in the  
474 accumulation of the metabolic signaling molecule L-2-hydroxyglutarate that affects genome-  
475 wide DNA methylation and promotes cellular proliferation (Li *et al.*, 2017). We found that  
476 second-instar lactate accumulation was strongly affected by genotype, suggesting differential  
477 timing of this switch among both wild-type and mito-nuclear genotypes. Investigating potential  
478 bioenergetics and life-history consequences of this genetic variation may reveal whether  
479 different metabolic strategies at the sub-cellular level fund similar or distinct fitness outcomes at  
480 the organismal level. This is critical for understanding whether populations harbor genetic  
481 variation in biochemical pathways that ultimately has similar fitness outcomes or whether we  
482 should expect to see the signatures of selection acting on enzymes that control shifts in metabolic  
483 flux (e.g., Flowers *et al.*, 2007; Pekny *et al.*, 2018).

484

485 *Physiological compensation in a mito-nuclear incompatible genotype comes at a cost*

486 Mitochondrial respiration coupled to ATP production was maintained in the mito-nuclear  
487 incompatible genotype at *in vitro* levels similar to control genotypes, despite compromised  
488 OXPHOS via a presumed defect in mitochondrial protein synthesis in this genotype (Meiklejohn  
489 *et al.*, 2013). The maintenance of mitochondrial respiration in this genotype was accompanied by  
490 increases in mitochondrial oxidative capacity, measured by citrate synthase activity, and  
491 glycolytic ATP production, measured by lactate accumulation, relative to control genotypes.

492 These increases may reflect physiological compensation to maintain ATP levels in a genotype  
493 whose mitochondria consume similar levels of oxygen but are less efficiently generating ATP.  
494 We suggest that by using the functional complementation of both glycolytic and mitochondrial  
495 ATP production, this genotype is able to synthesize the ATP needed to support its development.

496 Physiological compensation can have diverse and sometimes counter-intuitive costs paid  
497 over the lifespan that can adversely affect fitness. While (*sim<sup>w501</sup>*); *OreR* appears able to  
498 physiologically compensate to survive larval development, this genotype has delayed  
499 development and compromised pupation height, immune function and female fecundity  
500 (Meiklejohn *et al.*, 2013; Zhang *et al.*, 2017; Buchanan *et al.*, 2018). Additionally, while *in vitro*  
501 mitochondrial respiration in this genotype was maintained similar to other genotypes, larval  
502 metabolic rate in this genotype was elevated, potentially via compensatory upregulation of  
503 aerobic capacity to supply ATP (Hoekstra *et al.*, 2013). Thus, even when drawing on both  
504 glycolytic and oxidative ATP production, individuals with this mito-nuclear incompatibility may  
505 produce energy supplies very close to demand during larval growth. Previous results from our  
506 lab support this model; when development of (*sim<sup>w501</sup>*); *OreR* was empirically accelerated,  
507 development and reproduction were even more compromised, suggesting that this genotype has  
508 limited capacity to compensate the defect in OXPHOS (Hoekstra *et al.*, 2013, 2018). This  
509 genotype may use all of its aerobic scope to complete normal development compared to the other  
510 genotypes, leaving few resources leftover for other aspects of fitness. Once the demands of  
511 growth are removed, this genotype appears to regain some aerobic scope, as larvae that survived  
512 to pupation also completed metamorphosis and had normal adult size and metabolic rates  
513 (Hoekstra *et al.*, 2013, 2018). However, the costs paid out during development appear to have  
514 significant impacts on adult fecundity. Both female and male fecundity were severely

515 compromised in this genotype when development occurred at warmer temperatures that increase  
516 biological rates and energy demand (Hoekstra *et al.*, 2013; Zhang *et al.*, 2017).

517 At the cellular level, physiological compensation in (*sim<sup>w501</sup>*); *OreR* larvae may be a source  
518 of oxidative stress, indicated by higher levels of H<sub>2</sub>O<sub>2</sub>, relative to other genotypes. H<sub>2</sub>O<sub>2</sub> is a  
519 byproduct of the mitochondrial electron transport system (ETS) that supports OXPHOS in  
520 healthy cells, and we observed increases in H<sub>2</sub>O<sub>2</sub> as oxidative capacity increased across  
521 development in all genotypes. However, compromised electron flow through the ETS can  
522 increase H<sub>2</sub>O<sub>2</sub> levels and generate oxidative stress (Somero *et al.*, 2017). There are two ways that  
523 this may be occurring in (*sim<sup>w501</sup>*); *OreR* mitochondria. First, upregulation of the TCA cycle to  
524 supply more NADH for ATP production via the ETS may increase production of superoxide  
525 anion at Complex I. Second, there may be stoichiometric imbalance in the ETS due to  
526 presumably normal levels of cytoplasmically-translated Complex II but compromised levels of  
527 the mitochondrially-translated downstream OXPHOS complexes in this genotype. This could  
528 result in backflow of electrons that can produce superoxide ions when the ratio of  
529 reduced:unreduced coenzyme Q become elevated. The idea that (*sim<sup>w501</sup>*); *OreR* individuals are  
530 experiencing oxidative stress suggests an alternative interpretation of the elevated citrate  
531 synthase activity that we observed in this genotype. Levels of citrate synthase were increased in  
532 the blue mussel *Mytilus trossulus* in response to heat stress, a change that was coupled with  
533 increases in isocitrate dehydrogenase (IDH), which generates NADPH<sup>+</sup> to support H<sub>2</sub>O<sub>2</sub>-  
534 scavenging reactions in the mitochondria (Tomanek and Zuzow, 2010). This highlights the  
535 importance of considering that TCA cycle enzymes provide important functions beyond their  
536 role in OXPHOS, as they provide substrates for biosynthesis, support antioxidant reactions, and  
537 act as signaling molecules (Marden, 2013; Boukouris *et al.*, 2016; Somero *et al.*, 2017).



538 Finally, we observed that (*sim<sup>w501</sup>*); *OreR* mitochondria could support mitochondrial oxygen  
539 consumption linked to ATP production at wild-type levels despite the fact that their membrane  
540 potential was significantly reduced. There is precedence for this observation. For example,  
541 mitochondrial diseases with OXPHOS defects are correlated with a suite of metabolic  
542 phenotypes that include upregulated glycolysis, lactate accumulation, elevated ROS, and  
543 decreased mitochondrial membrane potential, but stable ATP levels (Szczepanowska *et al.*,  
544 2012; Frazier *et al.*, 2017). ROS act as essential secondary messengers in cellular homeostasis,  
545 but above a certain threshold level can be dangerous and lead to apoptosis (Giorgio *et al.*, 2007;  
546 Bigarella *et al.*, 2014). A potential regulatory and defense mechanism is to decrease the  
547 mitochondrial membrane potential (e.g., by uncoupling) to reduce further ROS production and  
548 protect the cell from oxidative damage (Dlasková *et al.*, 2006). Our data cannot distinguish in  
549 this mito-nuclear genotype whether upregulation of citrate synthase and decreased membrane  
550 potential in the mitochondria are the cause or the consequence of oxidative stress. However, new  
551 models from ecophysiology (Tomanek and Zuzow 2010), developmental physiological genetic  
552 (Tennessen *et al.* 2011, 2014; Li *et al.* 2017) and disease (Ward and Thompson 2012) systems  
553 provide promising paths for future elucidation of the mechanisms by which mitochondrial-  
554 nuclear genetic variation scales up to organismal fitness variation.

555 In conclusion, the dramatic and rapid growth of *Drosophila* during ontogeny requires a  
556 precise and genetically determined metabolic program that enhances biosynthesis and  
557 proliferation coupled with a tight temporal coordination. Here, we have shown how genetic  
558 variation influence patterns of metabolism in both natural and mito-nuclear genotypes of  
559 *Drosophila* during its developmental progression. Our study reveals that genetic defects in core  
560 physiology can be buffered at the organismal level via physiological compensation and that

561 natural populations likely harbor genetic variation for distinct metabolic strategies in  
 562 development that generate similar organismal outcomes.

### 563 Acknowledgements and funding

564 We would like to thank Madeleine Koenig who was supported by the Undergraduate Creative  
 565 Activities and Research Experience (UCARE) program at UNL for her assistance with sample  
 566 preparation. The research was supported by NSF-IOS CAREER Award 1149178, NSF EPSCoR  
 567 Track II Award 1736249 , and funds from the University of Nebraska-Lincoln to OBM, CRJ and  
 568 KLM.

569 **Table 1.** Genetic effects on routine metabolic rate (RMR) as a function of mass across  
 570 developmental instars

571

| Phenotype         | Genotype                    | Slope (95% CI) <sup>1</sup>                               | Y-intercept <sup>2</sup>                                              |
|-------------------|-----------------------------|-----------------------------------------------------------|-----------------------------------------------------------------------|
| First-instar RMR  |                             | H <sub>0</sub> : equal slopes<br>(LR=4.61, df=5, P=0.46)  | H <sub>0</sub> : no elevation difference<br>(Wald=9.28, df=5, P=0.10) |
|                   | Common slope                | 1.29 (1.10, 1.54)                                         |                                                                       |
|                   | VT10                        |                                                           | 0.66 (0.54, 0.77)                                                     |
|                   | VT4                         |                                                           | 0.75 (0.64, 0.86)                                                     |
|                   | (ore);Aut                   |                                                           | 0.62 (0.51, 0.73)                                                     |
|                   | (ore);OreR                  |                                                           | 0.61 (0.43, 0.79)                                                     |
|                   | (simw <sup>501</sup> );Aut  |                                                           | 0.50 (0.26, 0.75)                                                     |
|                   | (simw <sup>501</sup> );OreR |                                                           | 0.59 (0.42, 0.75)                                                     |
| Second-instar RMR |                             | H <sub>0</sub> : equal slopes<br>(LR=3.99, df=5, P=0.55)  | H <sub>0</sub> : no elevation difference<br>(Wald=2.58, df=5, P=0.76) |
|                   | Common slope                | 1.01 (0.90, 1.13)                                         |                                                                       |
|                   | VT10                        |                                                           | 0.65 (0.55, 0.75)                                                     |
|                   | VT4                         |                                                           | 0.71 (0.6, 0.81)                                                      |
|                   | (ore);Aut                   |                                                           | 0.67 (0.58, 0.75)                                                     |
|                   | (ore);OreR                  |                                                           | 0.62 (0.51, 0.73)                                                     |
|                   | (simw <sup>501</sup> );Aut  |                                                           | 0.67 (0.55, 0.79)                                                     |
|                   | (simw <sup>501</sup> );OreR |                                                           | 0.67 (0.57, 0.76)                                                     |
| Third-instar RMR  |                             | H <sub>0</sub> : equal slopes<br>(LR=20.1, df=5, P=0.001) |                                                                       |
|                   | VT10                        | 1.16 (0.65, 2.06)                                         |                                                                       |
|                   | VT4                         | 0.78 (0.54, 1.10)                                         |                                                                       |
|                   | (ore);Aut                   | 0.81 (0.65, 1.00)                                         |                                                                       |
|                   | (ore);OreR                  | 1.00 (0.81, 1.24)                                         |                                                                       |
|                   | (simw <sup>501</sup> );Aut  | 0.36 (0.25, 0.52)                                         |                                                                       |
|                   | (simw <sup>501</sup> );OreR | 0.41 (0.19, 0.89)                                         |                                                                       |

572 <sup>1</sup> Either a common or genotype-specific slope with confidence interval, when justified by the test  
 573 for equal slopes among genotypes.

574 <sup>2</sup> In no case was there evidence that there was a shift in mass along the x-axis among genotypes  
 575 ( $P > 0.09$ ).

576  
577

578 **Figure legends**

579 Figure 1. Metabolic scaling with mass varied across larval development and among genotypes.

580 A) The mass-scaling exponent for routine metabolic rate ( $\dot{V}CO_2$ ) differed significantly among  
581 instars ( $LR = 18.1$ ,  $df = 2$ ,  $P = 0.0001$ ), with the relationship between metabolic rate and mass  
582 becoming more shallow across development. B,C) There was more genetic variation for  
583 metabolic rate in first-instar larvae, relative to second-instar larvae. D) Mass-scaling exponents  
584 differed significantly among genotypes in the third instar of development (Table 1 and  
585 Supplemental Table 1).

586

587 Figure 2. Oxygen-coupled ATP production, measured by the State 3 mitochondrial oxygen  
588 consumption per unit of mitochondrial protein, was maintained at statistically similar levels  
589 across genotypes and instars (Supplemental Table 2).

590

591 Figure 3. Oxidative capacity, measured by citrate synthase activity ( $V_{max}$ ) per unit of  
592 mitochondrial protein, increased significantly across instars and was largest in the energetically-  
593 compromised (*simw*<sup>501</sup>);*OreR* genotype. A) While all mito-nuclear genotypes increased oxidative  
594 capacity throughout development, there was significant variation among genotypes.

595 (*simw*<sup>501</sup>);*OreR* larvae had significantly higher oxidative capacity than its nuclear genetic control

596 (*ore*);*OreR* in the second ( $*P_{Tukey's} = 0.015$ ) and third instars ( $**P_{Tukey's} = 0.008$ ). The *simw*<sup>501</sup>

597 mtDNA had no effect in the *Aut* background ( $P_{Tukey's} > 0.833$  in both instars), resulting in a

598 significant mtDNA x nuclear interaction ( $P = 0.022$ ). Wild-type genotypes from Vermont also

599 varied significantly in the extent to which oxidative capacity reached its maximal level in the

600 second versus third instar of development (Supplemental Table 3). Different letters within

601 genotypes denote significantly different means at  $P_{Tukey's} < 0.006$ , and asterisks designate  
602 significant differences between genotypes of the same larval instar.

603

604 Figure 4. A) Lactate levels per gram of larvae, varied significantly among genotypes in second-  
605 instar larvae and was highest in the energetically-compromised (*simw<sup>501</sup>*);*OreR* genotype.

606 Genetic variation for second-instar larval lactate levels was also observed among wild-type  
607 genotypes from Vermont (instar x genotype,  $P = 0.009$ ) (Supplemental Table 4), with *VT4*

608 having significantly more lactate than *VT10* (\*\* $P_{Tukey's} = 0.014$ ). B) There was a significant instar

609 x mtDNA x nuclear interaction effect on lactate levels ( $P = 0.033$ ) (Supplemental Table 4).

610 (*simw<sup>501</sup>*);*OreR* larvae had significantly higher lactate levels than all other genotypes in the

611 second instar ( $*P_{Tukey's} < 0.015$ ). B) Different letters within genotypes denote significantly

612 different means at  $P_{Tukey's} < 0.036$ , and asterisks designate significant differences between

613 genotypes of the same larval instar.

614

615 Figure 5. A) ROS levels, measured as the concentration of  $H_2O_2$  per gram of larvae, increased  
616 significantly across instars, and were highest in second-instar larvae of the energetically-

617 compromised (*simw<sup>501</sup>*);*OreR* genotype. B) There was a strong effect of instar on ROS levels

618 (instar,  $P = 2.347e-12$ ), but this pattern varied among mito-nuclear genotypes (instar x mtDNA x

619 nuclear,  $P = 5.166e-05$ ) (Supplemental Table 5). Second-instar (*simw<sup>501</sup>*);*OreR* larvae had

620 significantly higher ROS levels relative to all other genotypes (\*\* $P_{Tukey's} < 0.0001$ ), while all

621 other genotypes had similar patterns of increasing ROS throughout development. The interaction

622 between instar and genotype did not affect ROS levels among wild-type genotypes

623 (Supplemental Table 5), which had a similar pattern to the control mito-nuclear genotypes.

624 Different letters within genotypes denote significantly different means at  $P_{Tukey's} < 0.041$ , and  
625 asterisks designate significant differences between genotypes of the same larval instar.

626

627 Figure 6. The energetically compromised (*simw*<sup>501</sup>);*OreR* genotype had significantly decreased  
628 mitochondrial quality, as measured by the mitochondrial membrane potential ( $\Delta\Psi_m$ ). A) Both  
629 mito-nuclear and wild-type genotypes from Vermont generally maintained high membrane  
630 potential in second- and third-instar larvae. However, (*simw*<sup>501</sup>);*OreR* larvae had significantly  
631 lower mitochondrial membrane potential than the nuclear genetic control (*ore*);*OreR* in the  
632 second (\*\*\*) $P_{Tukey's} < 0.0001$ ) and third instars (\* $P_{Tukey's} = 0.016$ ). B) This effect of the *simw*<sup>501</sup>  
633 mtDNA was not evident in the *Aut* background, where it increased membrane potential in  
634 second-instar larvae and had no effect in third-instar larvae ( $P_{Tukey's} = 0.167$ ). This resulted in a  
635 significant effect of an instar x mito x nuclear interaction ( $P = 1.580e-05$ ) (Supplemental Table  
636 6). Values above 2 typically indicate healthy mitochondria. Different letters within genotypes  
637 denote significantly different means at  $P_{Tukey's} < 0.002$ , and asterisks designate significant  
638 differences between genotypes of the same larval instar.

639 **Figure 1.** Larval metabolic rate  
640

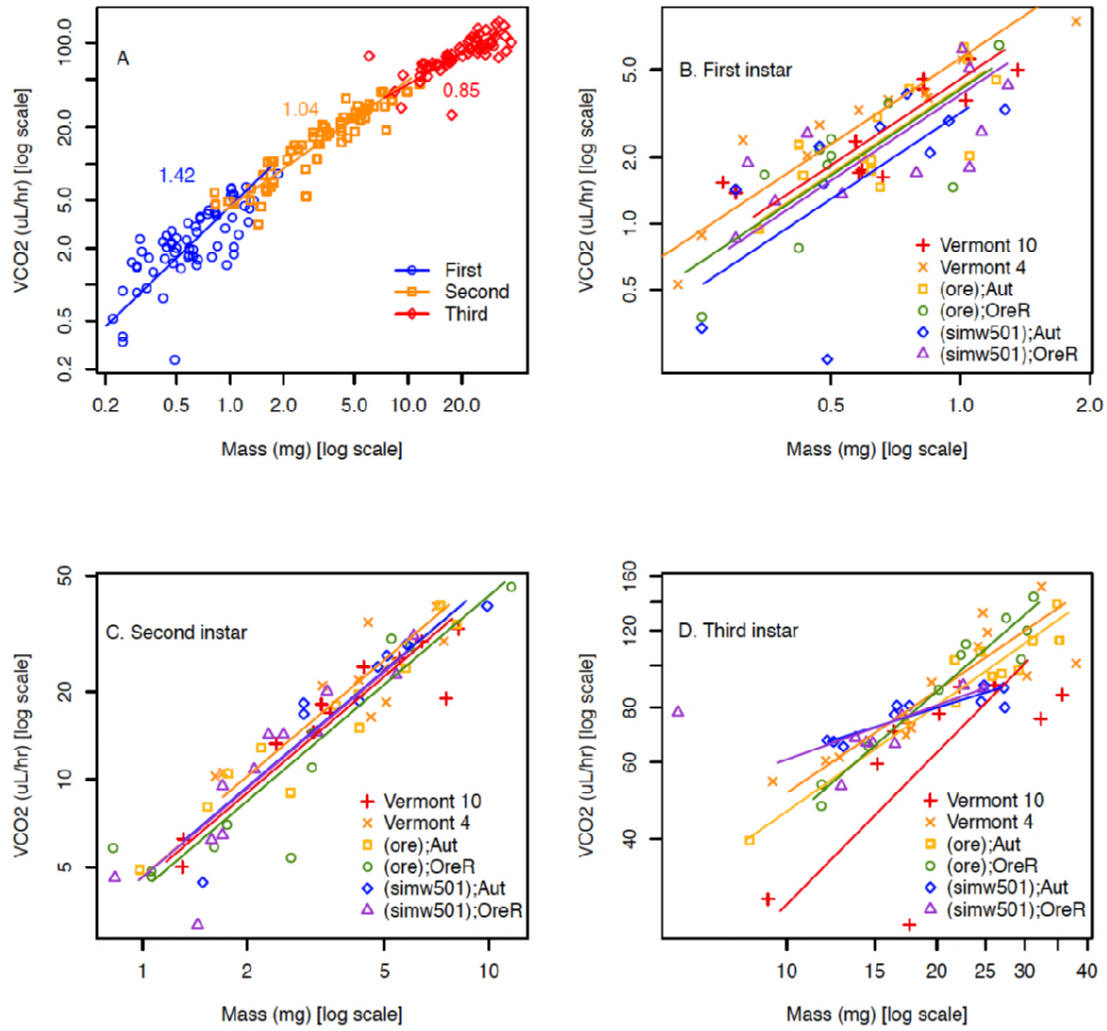

641

642 **Figure 2.** State 3 mitochondrial O<sub>2</sub> consumption

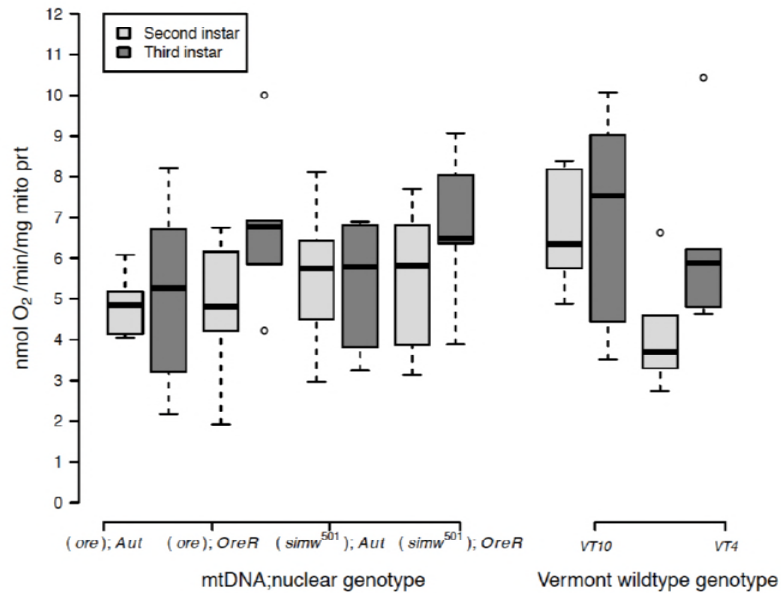

643



644 **Figure 3.** Citrate synthase activity  
645

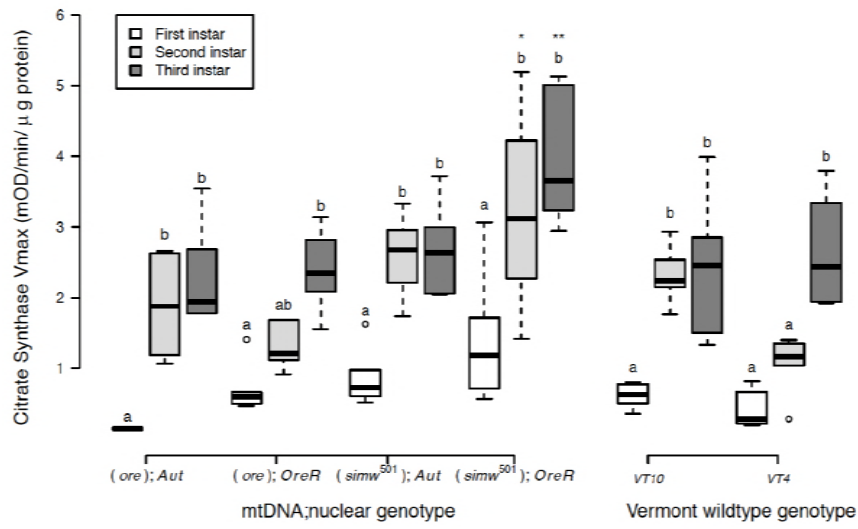

646

647 **Figure 4. Lactate accumulation**  
 648 **A.**

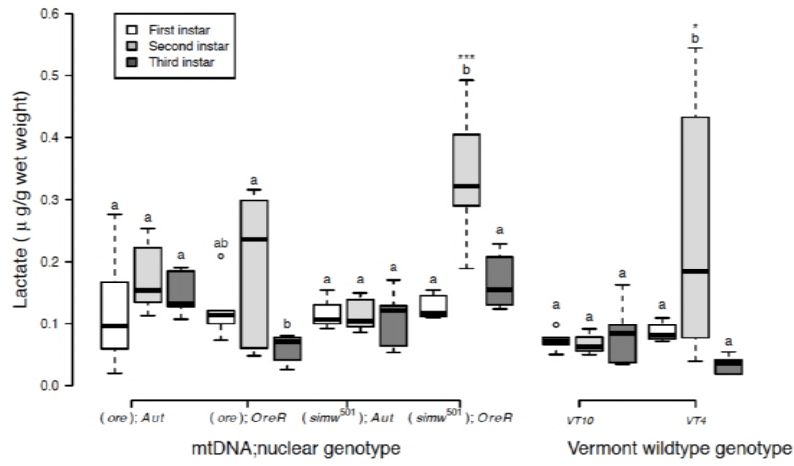

649  
 650

**B.**

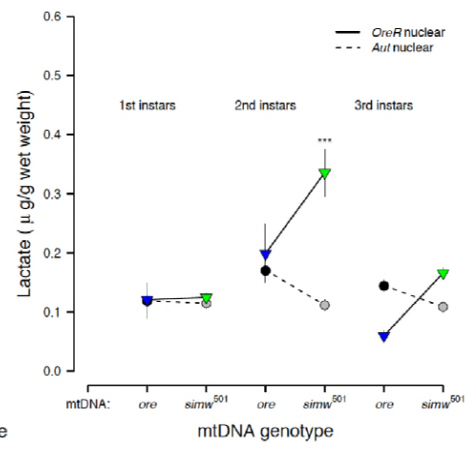

651 **Figure 5. Reactive oxygen species (H<sub>2</sub>O<sub>2</sub>)**  
 652 **A.**

653

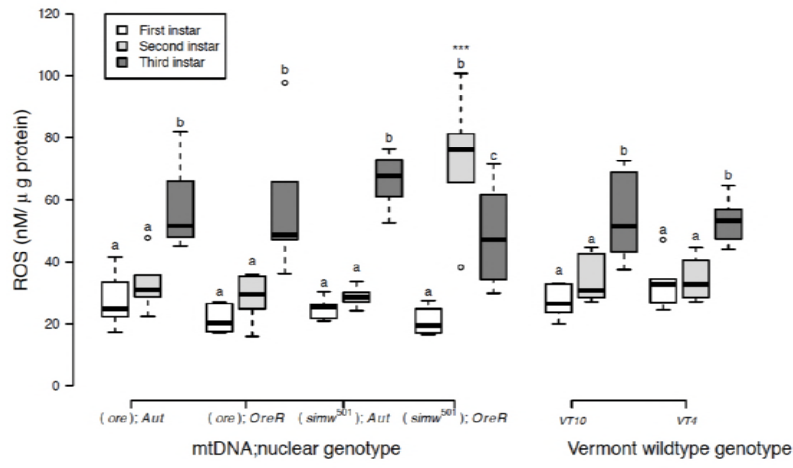

**B.**

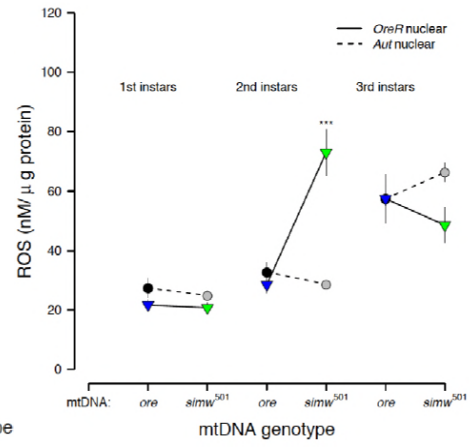

654

655

656

657 **Figure 6. Mitochondrial membrane potential ( $\Delta\Psi_m$ )**  
 658

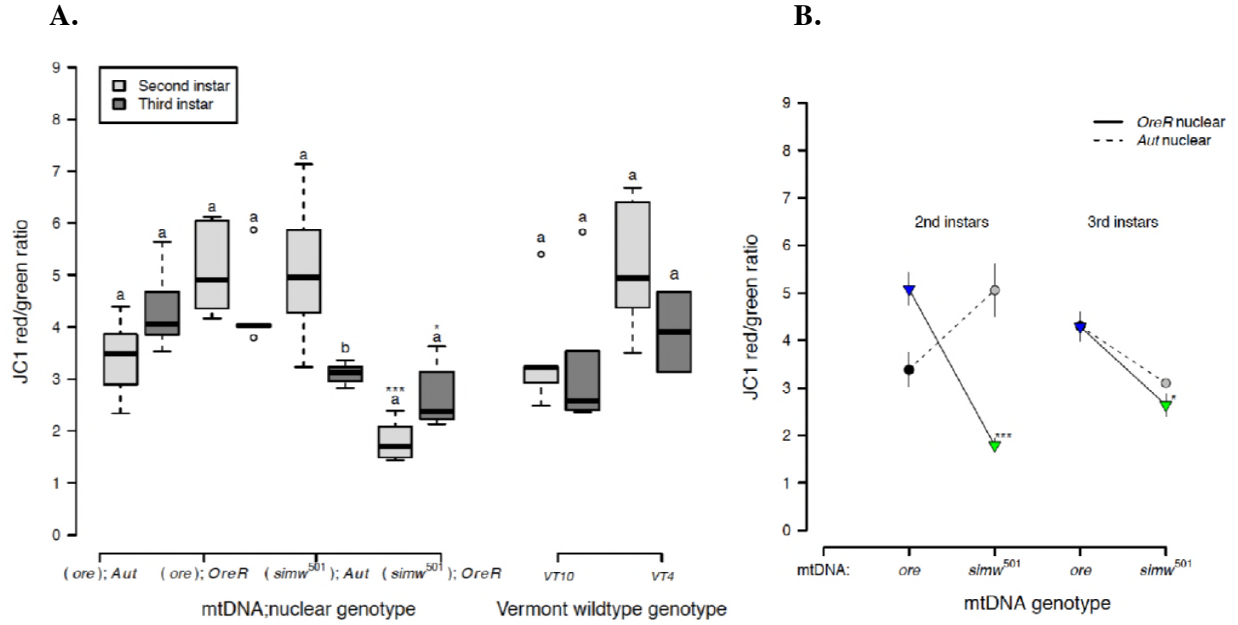

659  
 660  
 661  
 662  
 663  
 664  
 665  
 666  
 667  
 668  
 669  
 670  
 671  
 672  
 673  
 674  
 675  
 676  
 677  
 678  
 679  
 680  
 681  
 682  
 683  
 684  
 685  
 686  
 687

688 **Literature Cited**

689

- 690 Arnqvist G., Dowling D., Paul E., Laurene G., Tom T., *et al.*, 2010 Genetic architecture of  
691 metabolic rate: environment specific epistasis between mitochondrial and nuclear genes in  
692 an insect. *Evolution*. 64: 3354–3363.
- 693 Aw W., Bajracharya R., Towarnicki S., Ballard J., 2016 Assessing bioenergetic functions from  
694 isolated mitochondria in *Drosophila melanogaster*. *J. Biol. Methods*. 3: e42.
- 695 Ballard W., Rand D., 2005 The population biology of mitochondrial DNA and its phylogenetic  
696 implications. *Annu. Rev. Ecol. Evol. Syst.* 36: 621–642.
- 697 Barabási A., Oltvai Z., 2004 Network biology: understanding the cell’s functional organization.  
698 *Nat. Rev. Genet.* 5: 101.
- 699 Bigarella C., Liang R., Ghaffari S., 2014 Stem cells and the impact of ROS signaling.  
700 *Development* 141: 4206–4218.
- 701 Blossman-Myer B., Burggren W., 2010 Metabolic allometry during development and  
702 metamorphosis of the silkworm *Bombyx mori*: analyses, patterns, and mechanisms. *Physiol.*  
703 *Biochem. Zool.* 83: 215–231.
- 704 Boukouris A., Zervopoulos S., Michelakis E., 2016 Metabolic enzymes moonlighting in the  
705 nucleus: metabolic regulation of gene transcription. *Trends Biochem. Sci.* 41: 712–730.
- 706 Brand M., Chien L., Ainscow E., Rolfe D., Porter R., 1994 The causes and functions of  
707 mitochondrial proton leak. *Biochim. Biophys. Acta - Bioenerg.* 1187: 132–139.
- 708 Buchanan J., Meiklejohn C., Montooth K., 2018 Mitochondrial dysfunction and infection  
709 generate immunity-fecundity tradeoffs in *Drosophila*. *Integr. Comp. Biol.* 58: 591–603.
- 710 Burggren W., 2005 Developing animals flout prominent assumptions of ecological physiology.  
711 *Comp. Biochem. Physiol. Part A Mol. Integr. Physiol.* 141: 430–439.
- 712 Callier V., Nijhout F., 2011 Control of body size by oxygen supply reveals size-dependent and  
713 size-independent mechanisms of molting and metamorphosis. *Proc. Natl. Acad. Sci.* 108:  
714 14664–14669.
- 715 Callier V., Nijhout F., 2012 Supply-side constraints are insufficient to explain the ontogenetic  
716 scaling of metabolic rate in the tobacco hornworm, *Manduca sexta* (F Seebacher, Ed.).  
717 *PLoS One* 7: e45455.
- 718 Callier V., Hand S., Campbell J., Biddulph T., Harrison J., 2015 Developmental changes in  
719 hypoxic exposure and responses to anoxia in *Drosophila melanogaster*. *J. Exp. Biol.* 218:  
720 2927–2934.
- 721 Carvalho M., Sampaio J., Palm W., Brankatschk M., Eaton S., *et al.*, 2012 Effects of diet and  
722 development on the *Drosophila* lipidome. *Mol. Syst. Biol.* 8: 600.
- 723 Chance B., Williams G., 1955 Respiratory enzymes in oxidative phosphorylation: I. kinetics of  
724 oxygen utilization. *J. Biol. Chem.* 217: 383–394.
- 725 Charlesworth B., Charlesworth D., 2016 Population genetics from 1966 to 2016. *Heredity* 118:  
726 2.
- 727 Church R., Robertson F., 1966 A biochemical study of the growth of *Drosophila melanogaster*.  
728 *J. Exp. Zool.* 162: 337–351.
- 729 Clark A., Wang L., Hulleberg T., 1995a P-element-induced variation in metabolic regulation in  
730 *Drosophila*. *Genetics* 139: 337–348.
- 731 Clark A., Wang L., Hulleberg T., 1995b Spontaneous mutation rate of modifiers of metabolism  
732 in *Drosophila*. *Genetics* 139: 767–779.
- 733 Clark A., Wang L., 1997 Epistasis in measured genotypes: *Drosophila* p-element insertions.

- 734 Genetics 147: 157–163.
- 735 Crawford D., Oleksiak M., 2007 The biological importance of measuring individual variation. J.
- 736 Exp. Biol. 210: 1613 -1621.
- 737 Dlasková A., Špaček T., Škobisová E., Šantorová J., Ježek P., 2006 Certain aspects of
- 738 uncoupling due to mitochondrial uncoupling proteins in vitro and in vivo. Biochim.
- 739 Biophys. Acta - Bioenerg. 1757: 467–473.
- 740 Estabrook R., 1967 Mitochondrial respiratory control and the polarographic measurement of
- 741 ADP : O ratios. Methods Enzymol. 10: 41–47.
- 742 Flowers J., Sezgin E., Kumagai S., Duvernell D., Matzkin L., *et al.*, 2007 Adaptive evolution of
- 743 metabolic pathways in *Drosophila*. Mol. Biol. Evol. 24: 1347–1354.
- 744 Frazier A., Thorburn D., Compton A., 2017 Mitochondrial energy generation disorders: genes,
- 745 mechanisms and clues to pathology. J. Biol. Chem.
- 746 Gillespie J., 1999 The role of population size in molecular evolution. Theor. Popul. Biol. 55:
- 747 145–156.
- 748 Giorgio M., Trinei M., Migliaccio E., Pelicci P., 2007 Hydrogen peroxide: a metabolic by-
- 749 product or a common mediator of ageing signals? Nat. Rev. Mol. Cell Biol. 8: 722.
- 750 Glazier D., 2005 Beyond the ‘3/4-power law’: variation in the intra-and interspecific scaling of
- 751 metabolic rate in animals. Biol. Rev. 80: 611–662.
- 752 Glazier D., 2014 Metabolic scaling in complex living systems. Systems 2: 451–540.
- 753 Glazier D., 2015 Is metabolic rate a universal ‘pacemaker’ for biological processes? Biol. Rev.
- 754 90: 377–407.
- 755 Graveley B., Brooks A., Carlson J., Duff M., Landolin J., *et al.*, 2011 The developmental
- 756 transcriptome of *Drosophila melanogaster*. Nature 471: 473–479.
- 757 Greenlee K., Montooth K., Helm B., 2014 Predicting performance and plasticity in the
- 758 development of respiratory structures and metabolic systems. Integr. Comp. Biol. 54: 307–
- 759 322.
- 760 Harris H., 1966 Genetics of man enzyme polymorphisms in man. Proc. R. Soc. London. Ser. B.
- 761 Biol. Sci. 164: 298 -310.
- 762 Hoekstra L., Siddiq M., Montooth K., 2013 Pleiotropic effects of a mitochondrial–nuclear
- 763 incompatibility depend upon the accelerating effect of temperature in *Drosophila*. Genetics
- 764 195: 1129 -1139.
- 765 Hoekstra L., Julick C., Katelyn M., Montooth K., 2018 Energy demand and the context-
- 766 dependent effects of genetic interactions underlying metabolism. Evol. Lett. 2: 102–113.
- 767 Holmbeck M., Donner J., Villa-Cuesta E., Rand D., 2015 A *Drosophila* model for mito-nuclear
- 768 diseases generated by an incompatible interaction between tRNA and tRNA synthetase. Dis.
- 769 Model. Mech. 8: 843 -854.
- 770 Hubby J., Lewontin R., 1966 A molecular approach to the study of genic heterozygosity in
- 771 natural populations. I. the number of alleles at different loci in *Drosophila pseudoobscura*.
- 772 Genetics 54: 577–594.
- 773 Isler K., VanSchaik C., 2006 Metabolic costs of brain size evolution. Biol. Lett. 2: 557 -560.
- 774 Jeong H., Tombor B., Albert R., Oltvai Z., Barabási A., 2000 The large-scale organization of
- 775 metabolic networks. Nature 407: 651.
- 776 Kimura M., 1983 *The Neutral Theory of Molecular Evolution*. Cambridge University Press,
- 777 Cambridge.
- 778 Kurbalija N., Immonen E., Jelić M., Anđelković M., Stamenković-Radak M., *et al.*, 2014
- 779 Within-population genetic effects of mtDNA on metabolic rate in *Drosophila subobscura*.

- 780 J. Evol. Biol. 28: 338–346.
- 781 Laurie-Ahlberg C., Maroni G., Bewley G., Lucchesi J., Weir B., 1980 Quantitative genetic  
782 variation of enzyme activities in natural populations of *Drosophila melanogaster*. Proc.  
783 Natl. Acad. Sci. U. S. A. 77: 1073–1077.
- 784 Laurie-Ahlberg C., Wilton A., Curtsinger J., Emigh T., 1982 Naturally occurring enzyme activity  
785 variation in *Drosophila melanogaster*. I. sources of variation for 23 enzymes. Genetics 102:  
786 191–206.
- 787 Lewontin R., Hubby J., 1966 A molecular approach to the study of genic heterozygosity in  
788 natural populations. II. amount of variation and degree of heterozygosity in natural  
789 populations of *Drosophila pseudoobscura*. Genetics 54: 595–609.
- 790 Li H., Chawla G., Hurlburt A., Sterrett M., Zaslaver O., *et al.*, 2017 *Drosophila* larvae synthesize  
791 the putative oncometabolite L-2-hydroxyglutarate during normal developmental growth.  
792 Proc. Natl. Acad. Sci. 114: 1353–1358.
- 793 Lincet H., Icard P., 2014 How do glycolytic enzymes favour cancer cell proliferation by  
794 nonmetabolic functions? Oncogene 34: 3751.
- 795 Lunt S., Vander-Heiden M., 2011 Aerobic glycolysis: meeting the metabolic requirements of cell  
796 proliferation. Annu. Rev. Cell Dev. Biol. 27: 441–464.
- 797 Marden J., 2013 Nature's inordinate fondness for metabolic enzymes: why metabolic enzyme  
798 loci are so frequently targets of selection. Mol. Ecol. 22: 5743–5764.
- 799 Martin A., 1995 Metabolic rate and directional nucleotide substitution in animal mitochondrial  
800 DNA. Mol. Biol. Evol. 12: 1124–1131.
- 801 Meiklejohn C., Hartl D., 2002 A single mode of canalization. Trends Ecol. Evol. 17: 468–473.
- 802 Meiklejohn C., Holmbeck M., Siddiq M., Abt D., Rand D., *et al.*, 2013 An incompatibility  
803 between a mitochondrial tRNA and Its nuclear-encoded tRNA synthetase compromises  
804 development and fitness in *Drosophila*. PLoS Genet. 9: e1003238.
- 805 Miettinen T., Björklund M., 2017 Mitochondrial function and cell size: an allometric  
806 relationship. Trends Cell Biol. 27: 393–402.
- 807 Mitchell-Olds T., Pedersen D., 1998 The molecular basis of quantitative genetic variation in  
808 central and secondary metabolism in *Arabidopsis*. Genetics 149: 739–747.
- 809 Montooth K., Marden J., Clark A., 2003 Mapping determinants of variation in energy  
810 metabolism, respiration and flight in *Drosophila*. Genetics 165: 623 LP-635.
- 811 Montooth K., Meiklejohn C., Abt D., Rand D., 2010 Mitochondrial-nuclear epistasis affects  
812 fitness within species but does not contribute to fixed incompatibilities between species of  
813 *Drosophila*. Evolution 64: 3364–3379.
- 814 Nespolo R., Castañeda L., Roff D., 2007 Quantitative genetic variation of metabolism in the  
815 nymphs of the sand cricket, *Gryllus firmus*, inferred from an analysis of inbred-lines. Biol.  
816 Res. 40: 5–12.
- 817 O'Farrell P., 2004 How metazoans reach their full size: the natural history of bigness. In: Hall M,  
818 Raff M, Thomas G (Eds.), *Cell Growth: Control of Cell Size*, Cold Spring Harbor  
819 Laboratory Press, New York, pp. 1–22.
- 820 Pekny J., Smith P., Marden J., 2018 Enzyme polymorphism, oxygen and injury: a lipidomic  
821 analysis of flight-induced oxidative damage in a succinate dehydrogenase d (Sdhd)-  
822 polymorphic insect. J. Exp. Biol. 221.
- 823 Porter R., Brand M., 1993 Body mass dependence of H<sup>+</sup> leak in mitochondria and its relevance to  
824 metabolic rate. Nature 362: 628.
- 825 Porter R., Hulbert A., Brand M., 1996 Allometry of mitochondrial proton leak: influence of

- 826 membrane surface area and fatty acid composition. *Am. J. Physiol. Integr. Comp. Physiol.*  
827 271: R1550–R1560.
- 828 Ravasz E., Somera A., Mongru D., Oltvai Z., Barabási A., 2002 Hierarchical organization of  
829 modularity in metabolic networks. *Science*. 297: 1551–1555.
- 830 Ricklefs R., 2003 Is rate of ontogenetic growth constrained by resource supply or tissue growth  
831 potential? A comment on West *et al.*'s model. *Funct. Ecol.* 17: 384–393.
- 832 Sears K., Kerkhoff A., Messerman A., Itagaki H., 2012 Ontogenetic scaling of metabolism,  
833 growth, and assimilation: testing metabolic scaling theory with *Manduca sexta* larvae.  
834 *Physiol. Biochem. Zool.* 85: 159–173.
- 835 Shin O., Yasuo I., 1984 Allometric relationship between tissue respiration and body mass in the  
836 carp. *Comp. Biochem. Physiol. A. Mol. Integr. Physiol.* 77: 415–418.
- 837 Shin O., Yasuo I., 1993 Allometric relationship between tissue respiration and body mass in a  
838 marine teleost, porgy *Pagrus major*. *Journal Comparative Biochem. Physiol. Part A Physiol.*  
839 105: 129–133.
- 840 Somero G., Lockwood B., Tomanek L., 2017 *Biochemical adaptation: response to environmental*  
841 *challenges from life's origins to the anthropocene*.
- 842 Strogatz S. H., 2001 Exploring complex networks. *Nature* 410: 268.
- 843 Szczepanowska J., Malinska D., Wieckowski M., Duszynski J., 2012 Effect of mtDNA point  
844 mutations on cellular bioenergetics. *Biochim. Biophys. Acta - Bioenerg.* 1817: 1740–1746.
- 845 Tennessen J., Baker K., Lam G., Evans J., Thummel C., 2011 The *Drosophila* estrogen-related  
846 receptor directs a metabolic switch that supports developmental growth. *Cell Metab.* 13:  
847 139–148.
- 848 Tennessen J. M., Thummel C. S., 2011 Coordinating growth and review maturation — insights  
849 from *Drosophila*. *Curr. Biol.* 21: R750–R757.
- 850 Tennessen J. M., Bertagnolli N. M., Evans J., Sieber M. H., Cox J., *et al.*, 2014 Coordinated  
851 metabolic transitions during *Drosophila* embryogenesis and the onset of aerobic glycolysis.  
852 *G3 Genes/Genomes/Genetics* 4: 839–850.
- 853 Tieleman I., Versteegh M., Fries A., Helm B., Dingemans N., *et al.*, 2009 Genetic modulation  
854 of energy metabolism in birds through mitochondrial function. *Proc. R. Soc. B Biol. Sci.*  
855 276: 1685 LP-1693.
- 856 Tishkoff S., Varkonyi R., Cahinhinan N., Abbes S., Argyropoulos G., *et al.*, 2001 Haplotype  
857 diversity and linkage disequilibrium at human G6PD: recent origin of alleles that confer  
858 malarial resistance. *Science*. 293: 455 LP-462.
- 859 Tomanek L., Zuzow M., 2010 The proteomic response of the mussel congeners *Mytilus*  
860 *galloprovincialis* and *M. trossulus* to acute heat stress: implications for thermal tolerance  
861 limits and metabolic costs of thermal stress. *J. Exp. Biol.* 213: 3559–3574.
- 862 VanDyken D., Wade M., 2010 The genetic signature of conditional expression. *Genetics* 184:  
863 557–570.
- 864 Verrelli B., Eanes W., 2001 The functional impact of Pgm amino acid polymorphism on  
865 glycogen content in *Drosophila melanogaster*. *Genetics* 159: 201–210.
- 866 Villa-Cuesta E., Holmbeck M., Rand D., 2014 Rapamycin increases mitochondrial efficiency by  
867 mtDNA-dependent reprogramming of mitochondrial metabolism in *Drosophila*. *J. Cell Sci.*  
868 127: 2282–2290.
- 869 Vollmer J., Casares F., Iber D., 2017 Growth and size control during development. *Open Biol.* 7.  
870 VonBertalanffy L., Pirozynski W., 1953 Tissue respiration, growth, and basal metabolism. *Biol.*  
871 *Bull.* 105: 240–256.



- 872 Waddington C., 1942 Canalization of development and the inheritance of acquired characters.  
873 Nature 150: 563.
- 874 Waddington C., 1957 *The strategy of the genes: a discussion of some aspects of theoretical*  
875 *biology*. London: George Allen & Unwin, Ltd.
- 876 Ward P. S., Thompson C. B., 2012 Signaling in control of cell growth and metabolism. Cold  
877 Spring Harb. Perspect. Biol. 4.
- 878 Warton D., Wright I., Falster D., Westoby M., 2006 Bivariate line-fitting methods for allometry.  
879 Biol. Rev. 81: 259–291.
- 880 Watt W., 1977 Adaptation at specific loci. I. natural selection on phosphogluco isomerase of  
881 *Colias* butterflies: biochemical and population aspects. Genetics 87: 177 -194.
- 882 Watt W., Cassin R., Swan M., 1983 Adaptation at specific loci. III. field behavior and  
883 survivorship differences among *Colias* PGI genotypes are predictable from in vitro  
884 biochemistry. Genetics 103: 725 -739.
- 885 Watt W., Wheat C., Meyer E., Martin J., 2003 Adaptation at specific loci. VII. natural selection,  
886 dispersal and the diversity of molecular–functional variation patterns among butterfly  
887 species complexes (*Colias*: Lepidoptera, Pieridae). Mol. Ecol. 12: 1265–1275.
- 888 Zhang C., Montooth K., Calvi B., 2017 Incompatibility between mitochondrial and nuclear  
889 genomes during oogenesis results in ovarian failure and embryonic lethality. Development  
890 144: 2490–2503.
- 891
